# Supplementary material
Source: PubMed Central journal article supplement (PMC5738734)
Supplement: JB.00535-17_zjb002184616s1.pdf [file JB.00535-17_zjb002184616s1.pdf]

Vega & Margolin, Supplementary data

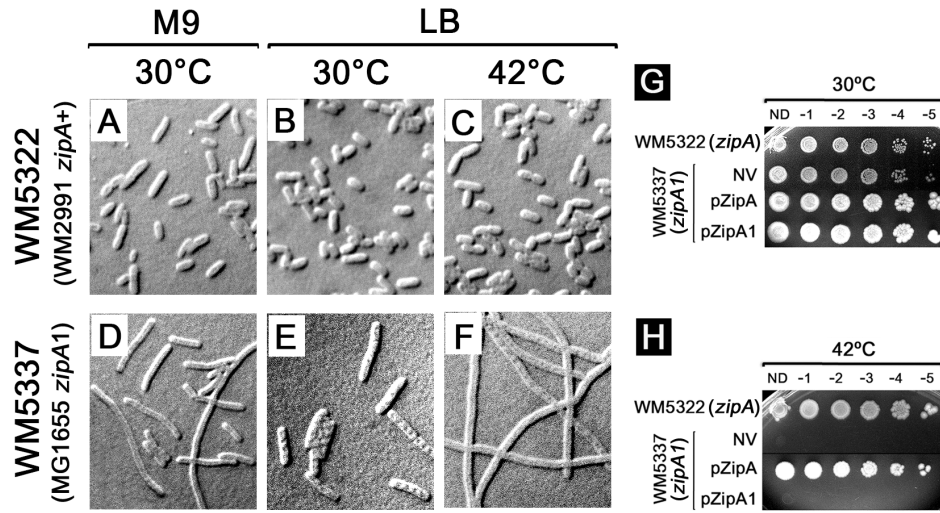

**Figure S1. The *zipA1* allele is necessary and sufficient for the thermosensitive cell division phenotypes.**

WM5322 (the original *zipA1* strain WM2991 transduced with the linked *nupC::Tn10* marker and confirmed to have acquired *zipA+*) and WM5337 (MG1655 transduced with the linked *nupC::Tn10* marker and confirmed to have acquired *zipA1*) were grown in M9 at 30°C (A, D), LB at 30°C (B and E) or 42°C (C and F). A spot assay was carried out with WM5322 and WM5337 transformed with pDSW210-*zipA-gfp* (pZipA) or pDSW210-*zipA1-gfp* in LB at 30°C (G) or 42°C (H). Scale bar, 4 μm.

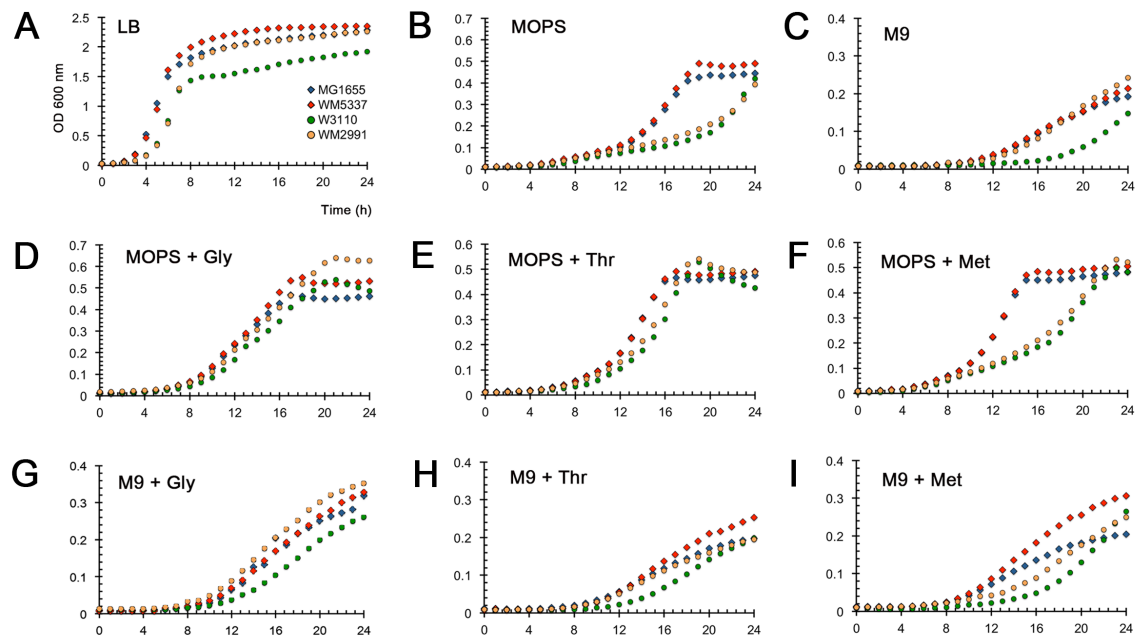

**Figure S2. Medium-dependent growth differences between W3110 and MG1655 derivatives.**

Parent strains MG1655 (blue rhombus) and W3110 (green circle), and mutant derivatives WM5337 (MG1655 *zipA1* (red rhombus)) and WM2991 (W3110 *zipA1* (orange circle)), were grown for 24 h at 30°C in LB (A), MOPS (B), M9 (C), MOPS plus 0.5 mM of glycine (E), L-threonine (E), L-methionine (F) and M9 plus 0.5 mM of glycine (G), L-threonine (H) or L-methionine (I).

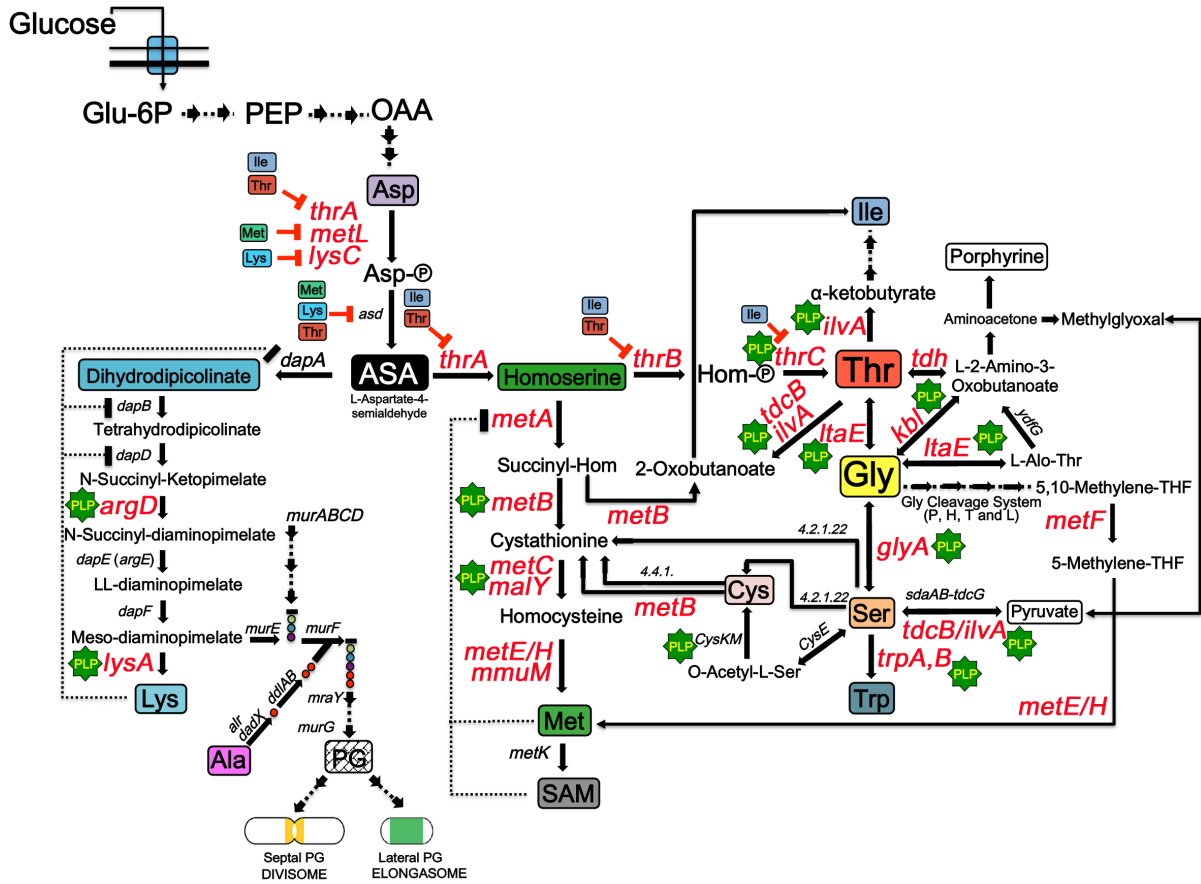

**Figure S3. Partial overview of the metabolic pathways for synthesis of amino acids relevant to this study.**

Solid black arrows represent the direction of reactions. Green stars indicate enzymatic reactions requiring PLP as cofactor; Blocked arrows indicate inhibition of the reaction.

Genes in red indicate those single deleted in a *zipA1* background. Abbreviations: Glu-6P, glucose 6-phosphate; PEP, phosphoenolpyruvate; OAA, oxaloacetate; Asp, aspartate; ASA, L-aspartate-4-semialdehyde; PG, peptidoglycan; Lys, lysine; Ala, alanine; Ile, isoleucine; Thr, threonine; Gly, glycine; Ser, serine; Trp, tryptophan; PLP, Pyridoxal 5-phosphate; SAM, S-adenosyl-methionine; Succinyl-Hom, O-succinyl L-homoserine.

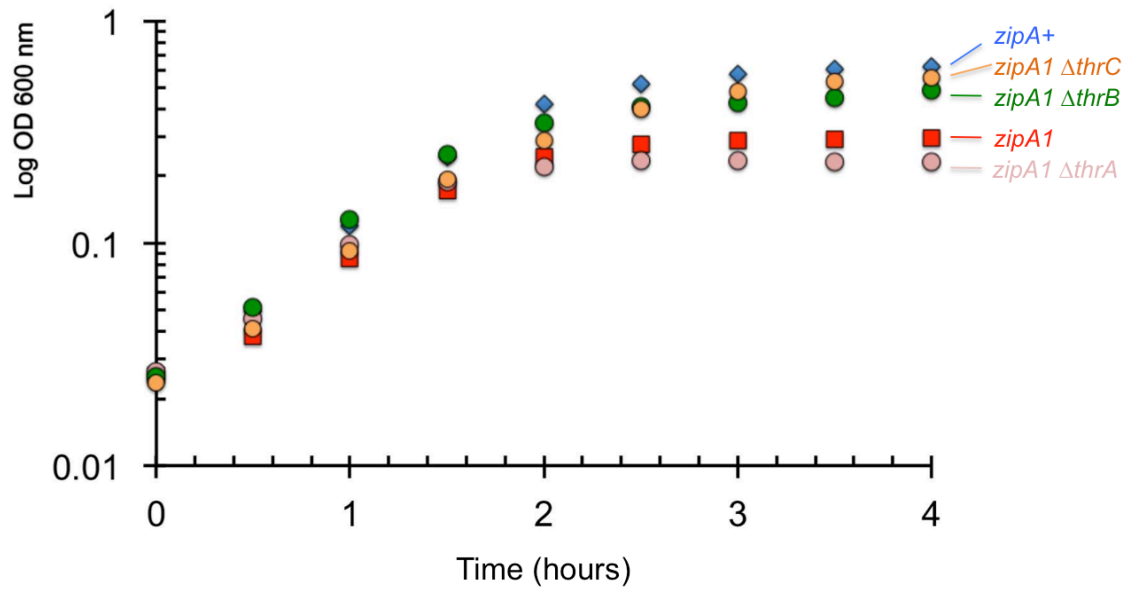

**Figure S4. Growth curves of suppressed and non-suppressed *zipA1* derivatives at 37°C in LB.** Cells were grown at 30°C to early logarithmic phase and then shifted to 37°C at time zero.
